# Supplementary material
Source: MDPI journal article supplement (https://www.mdpi.com/2079-6412/12/2/233)
Supplement: s1 [file s1]

# Enhanced Electrocatalytic CO<sub>2</sub> Reduction of Bismuth Nanosheets with Introducing Surface Bismuth Subcarbonate

Shiyuan Liu <sup>1</sup>, Botao Hu <sup>1</sup>, Junkai Zhao <sup>1,2</sup>, Wenjun Jiang <sup>1</sup>, Deqiang Feng <sup>1</sup>, Ce Zhang <sup>1,\*</sup> and Wei Yao <sup>1,\*</sup>

<sup>1</sup> Qian Xuesen Laboratory of Space Technology, China Academy of Space Technology (CAST), Beijing, 100094, China; liushiyuanchn@yeah.net (S.L.); hubotao@qxslab.cn (B.H.); 202031150009@mail.bnu.edu.cn (J.Z.); jiangwenjun@qxslab.cn (W.J.); fengdeqiang@qxslab.cn (D.F.)

<sup>2</sup> Beijing Key Laboratory of Energy Conversion and Storage Materials, College of Chemistry, Beijing Normal University, Beijing 100875, China

\* Correspondence: zhangce@qxslab.cn (C.Z.); yaowei@qxslab.cn (W.Y.)

## Evaluation of CO<sub>2</sub>RR performance

The gas Faradaic efficiency (FE) was calculated based on the differential forms of the Faradaic formula. The molar flow of gas from the flow-cell reactor was calculated using the concentration of species *m* measured by GC (*x<sub>g</sub>*, (mol mol<sup>-1</sup>)) and the CO<sub>2</sub> flow rate (*f<sub>CO2</sub>* (mol s<sup>-1</sup>)). Considering the low concentration of gas production and that the outlet is connected to the air, the molar ratio (*x<sub>g</sub>*) can be replaced by partial pressure directly. So, the FE<sub>*m*</sub> is the percentage of the partial current in the total current (*i<sub>tot</sub>*, (A)):

$$FE_g (\%) = i_g / i_{tot} \times 100\% = 96485 \times x_g \times f_{CO2} \times Z_g / i_{tot} \times 100\% \quad (1)$$

The FE of the formate ion in liquid was calculated based on the concentration (*c<sub>l</sub>*, mol L<sup>-1</sup>) detected by High Performance Liquid Chromatography (HPLC).

$$FE_l (\%) = q_l / q_{tot} = 96485 \times c_l \times V \times Z_l / q_{tot} \times 100\% \quad (2)$$

*V* was the volume of the cathode electrolyte and *q<sub>tot</sub>* was the total Coulomb electricity.

The long-term electrocatalytic CO<sub>2</sub> reduction reaction measurements were conducted in a three-electrode flow-cell reactor. The catholyte and anolyte were both 0.5 M KHCO<sub>3</sub> and were separated by an anion exchange membrane with a flow rate of 20 sccm. Figure S10 is the experimental equipment placement. A gas chromatography (GC, Shimadzu GC-2014C) set-up was employed for the gas analysis. A half a milliliter of product was injected into the GC to analyze the gas species and concentration on the appointed chronoamperometry. Meanwhile, the liquid was collected after each chronoamperometry.

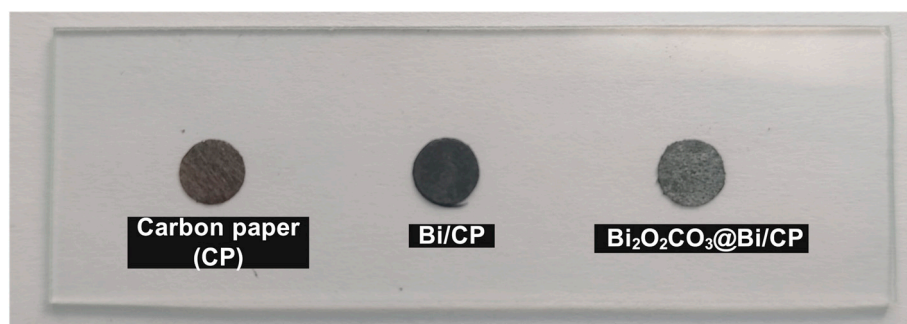

**Figure S1.** The sample photo of original carbon paper, dendrite Bi/CP, and Bi<sub>2</sub>O<sub>2</sub>CO<sub>3</sub>@Bi/CP.

As the image shows, the surface morphology transformation can be observed easily. The Bi<sub>2</sub>O<sub>2</sub>CO<sub>3</sub>@Bi/CP sample appeared as a white color. In fact, the transformation degree is related to the exposure time for the Bi nanosheets, but is hard for the Bi dendrite.

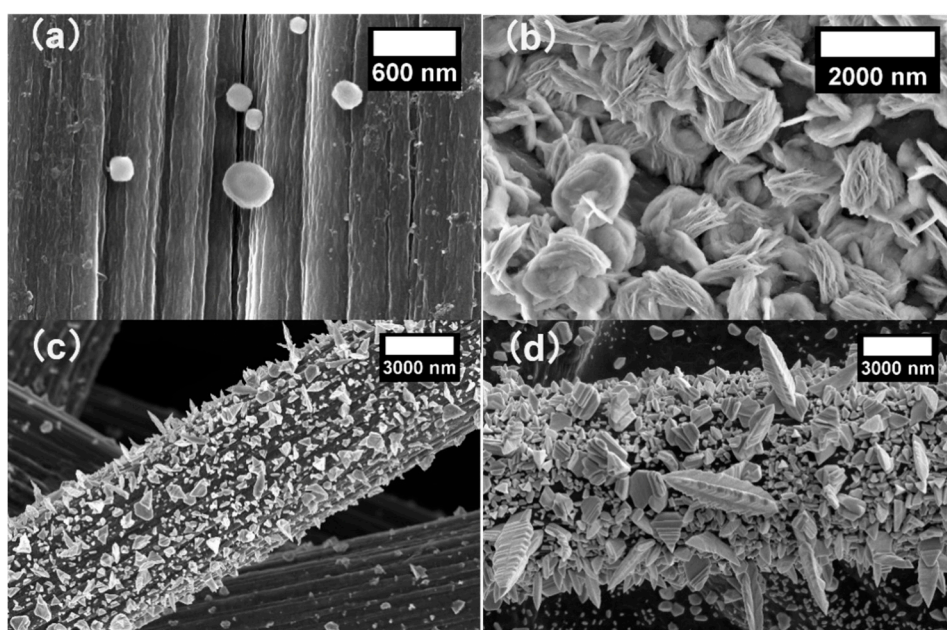

**Figure S2.** SEM images of samples on different pulse current: (a)  $0.4 \text{ mA cm}^{-2}$ , (b)  $0.8 \text{ mA cm}^{-2}$ , (c)  $1.2 \text{ mA cm}^{-2}$ , and (d)  $1.6 \text{ mA cm}^{-2}$ .

Under the different pulse current conditions, the Bi/CP samples' crystal morphologies are distinct. A scattered Bi nucleus was grown on the carbon paper under  $0.4 \text{ mA cm}^{-2}$ . In contrast, the Bi metal was grown into a bulk-structured form at  $1.2 \text{ mA cm}^{-2}$  and with a larger current.

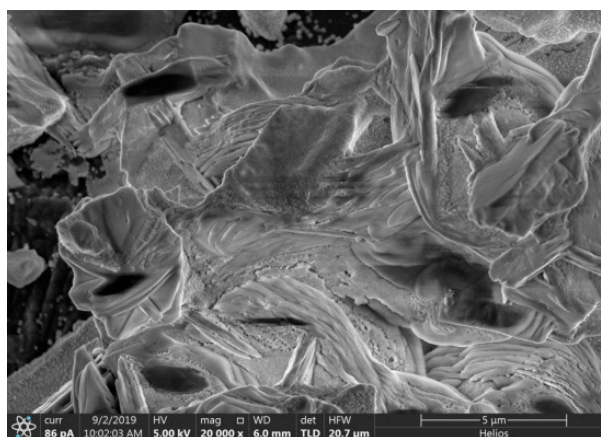

**Figure S3.** SEM image of electrode at 90 min electrodeposition with a current density of  $0.8 \text{ mA cm}^{-2}$ .

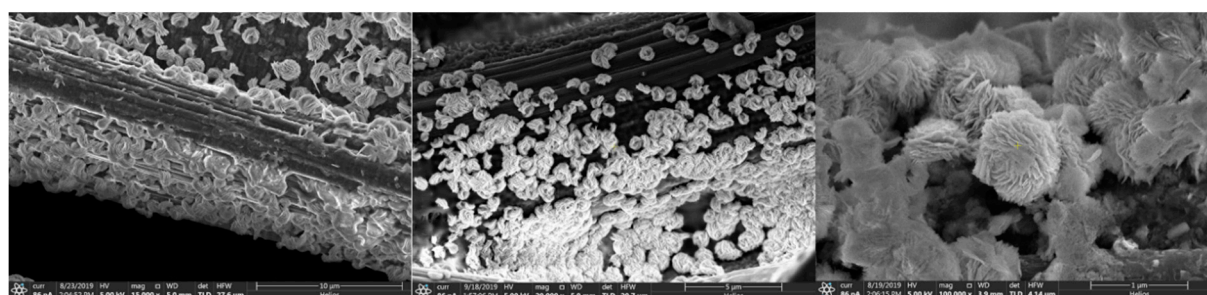

**Figure S4.** SEM photographs at different magnifications.

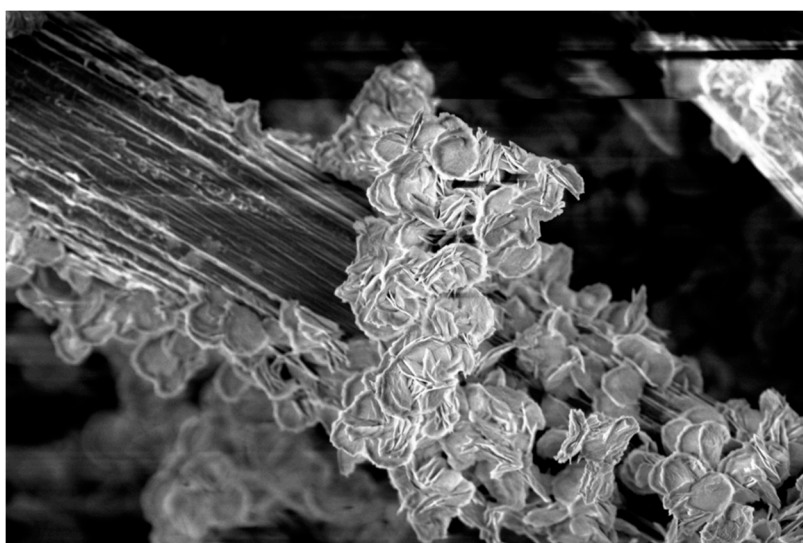

**Figure S5.** SEM characterizations of a flower-like Bi sample exposed in air for a long time (>60 h).

After a long-term air exposure,  $\text{CO}_2$  and  $\text{O}_2$  reacted with the Bi nanosheets and formed  $\text{Bi}_2\text{O}_2\text{CO}_3$ .

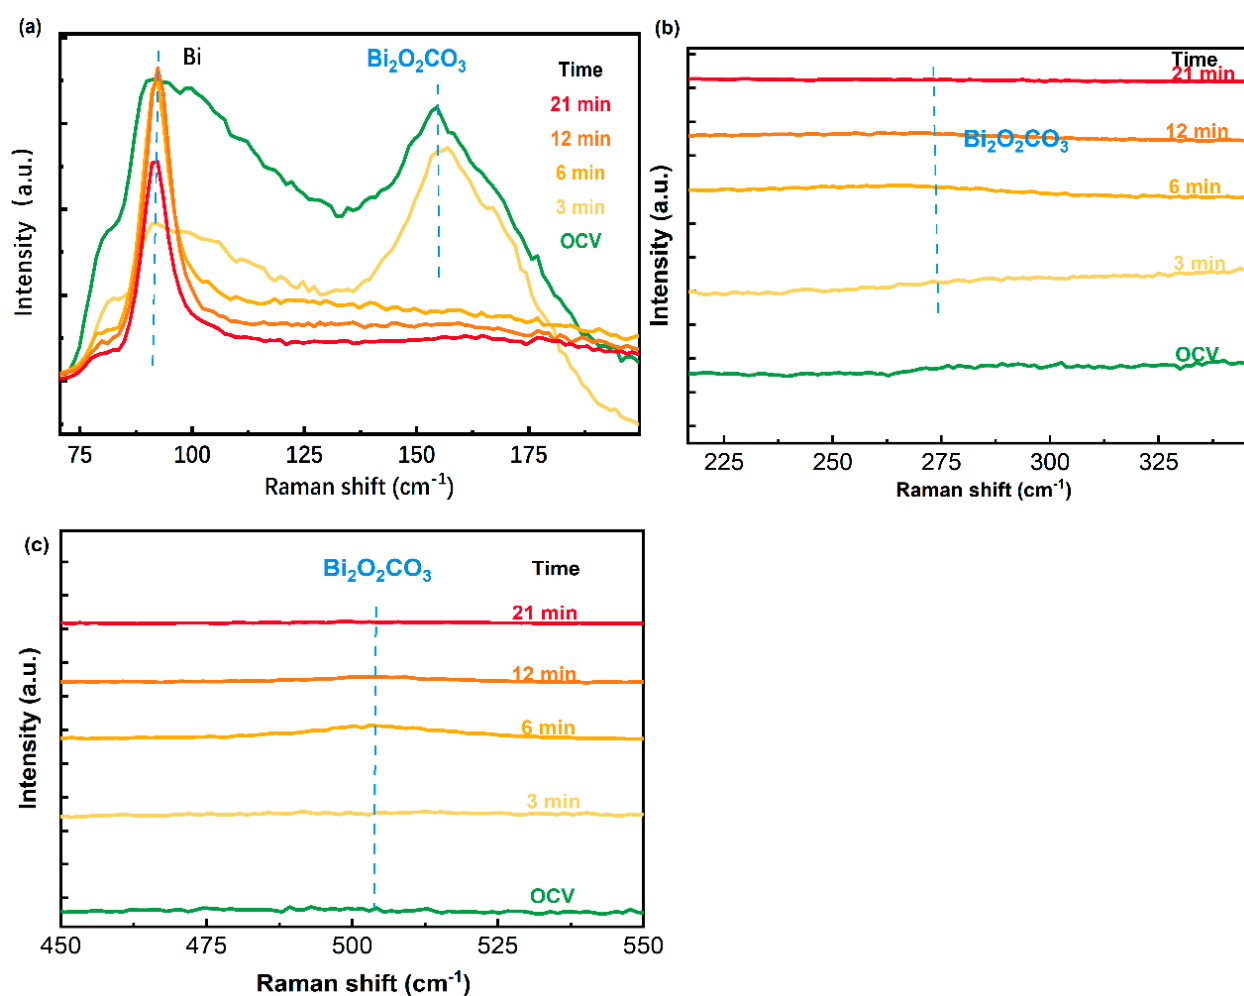

**Figure S6.** The particular Raman spectra of  $\text{Bi}_2\text{O}_2\text{CO}_3$ @Bi/CP: (a) the Bi-Bi bond peak and Bi-O bond peak; (b) the broad external vibration peaks on  $\text{Bi}_2\text{O}_2\text{CO}_3$ ; and (c) the Bi=O bond peak.

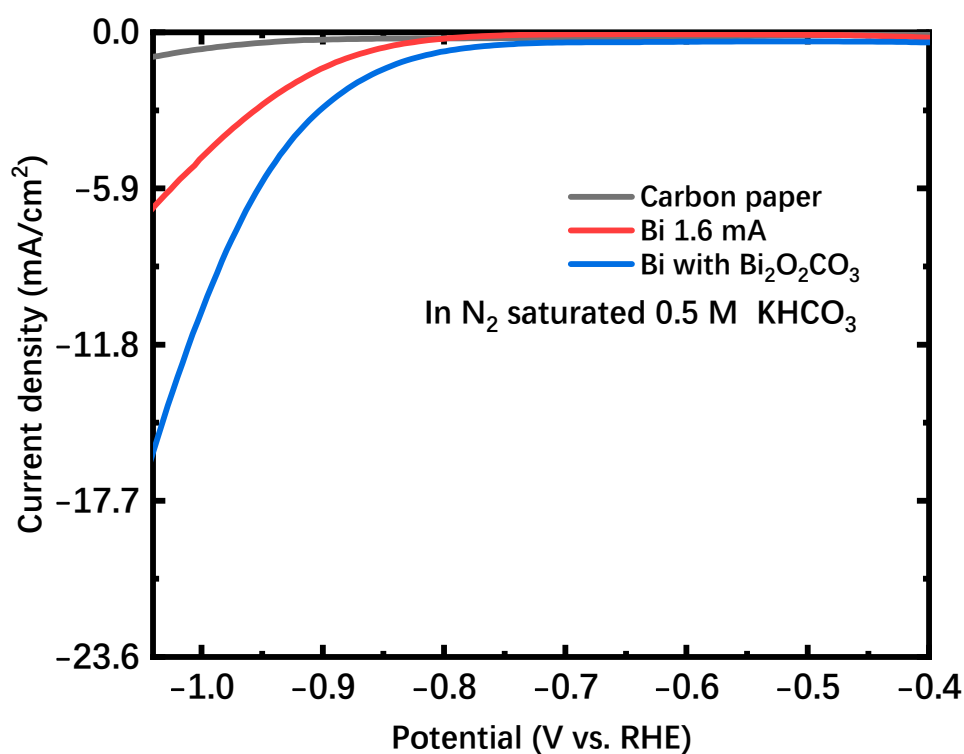

**Figure S7.** LSV curves of Carbon paper, Bi/CP, and Bi<sub>2</sub>O<sub>2</sub>CO<sub>3</sub>@Bi/CP in the N<sub>2</sub> saturated 0.5 M KHCO<sub>3</sub>.

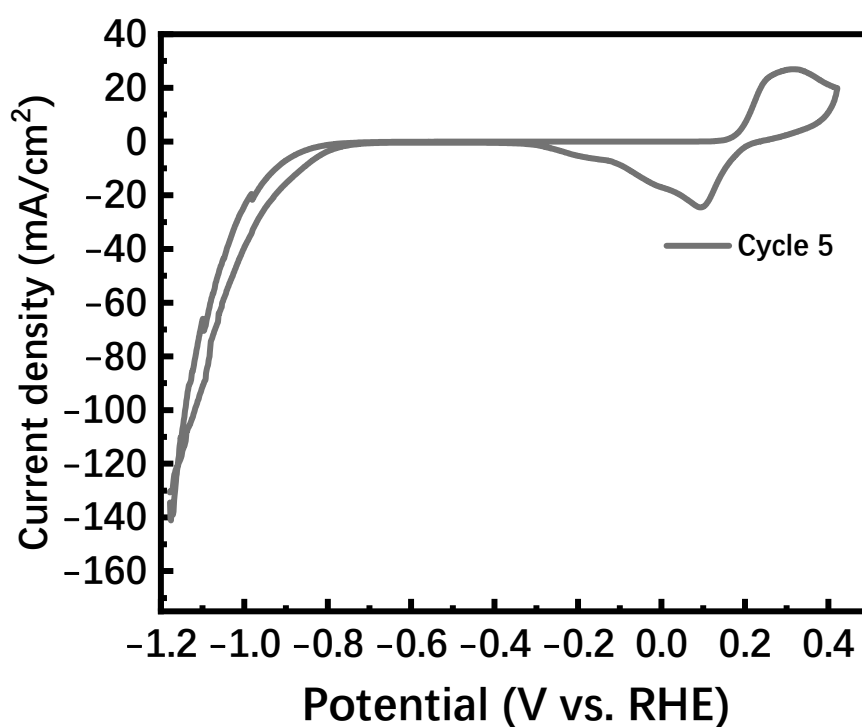

**Figure S8.** The typical CV curve of a pristine Bi<sub>2</sub>O<sub>2</sub>CO<sub>3</sub>@Bi/CP at scanning rate of 20 mV s<sup>-1</sup> from -1.2 to 0.4 V vs. RHE.



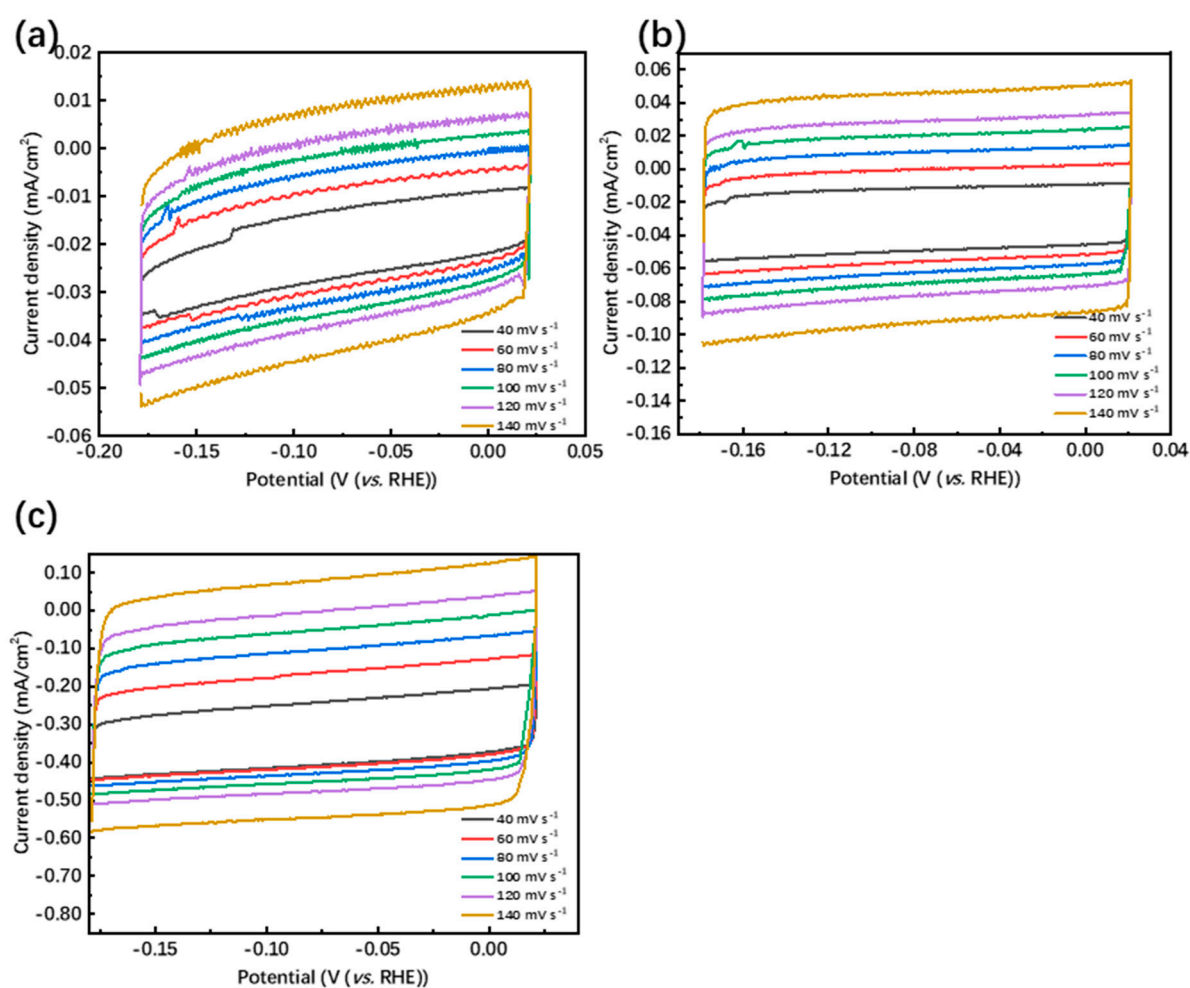

**Figure S9.** CV curves of different samples: (a) the CV curves result of original carbon paper; (b) the CV curves test of Bi/CP; (c) the CV curves of Bi<sub>2</sub>O<sub>2</sub>CO<sub>3</sub>@Bi/CP.

For measuring the double-layer capacitance of ( $C_{dl}$ ) of different samples, the cyclic voltammetry (CV) curves were recorded at a non-Faradaic region of the potential, which was between 0.0 to −0.2 V vs. RHE (0.5 M KHCO<sub>3</sub>). The scan rates were 40 to 140 mV s<sup>−1</sup> with an interval of 20 mV s<sup>−1</sup>. The  $C_{dl}$  was estimated by plotting the  $\Delta j = (j_a - j_c)$  at −0.1 V vs. RHE ( $j_c$  and  $j_a$  were the cathodic and anodic current densities, respectively).

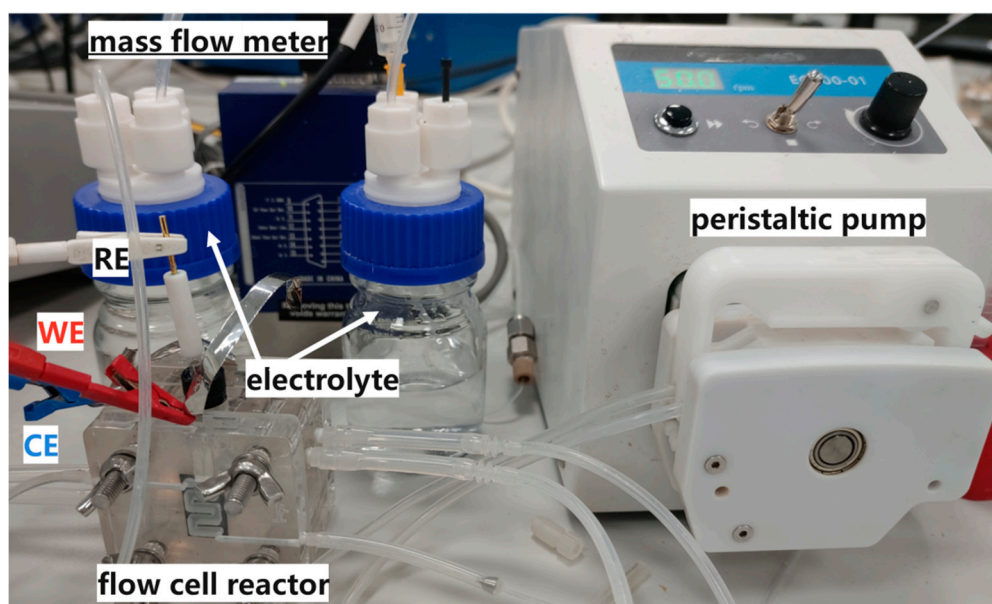

Figure S10. A flow cell reactor for CO<sub>2</sub>RR with auxiliary equipment, including peristaltic pump, mass flow meter, resource gas, and electrochemical station.

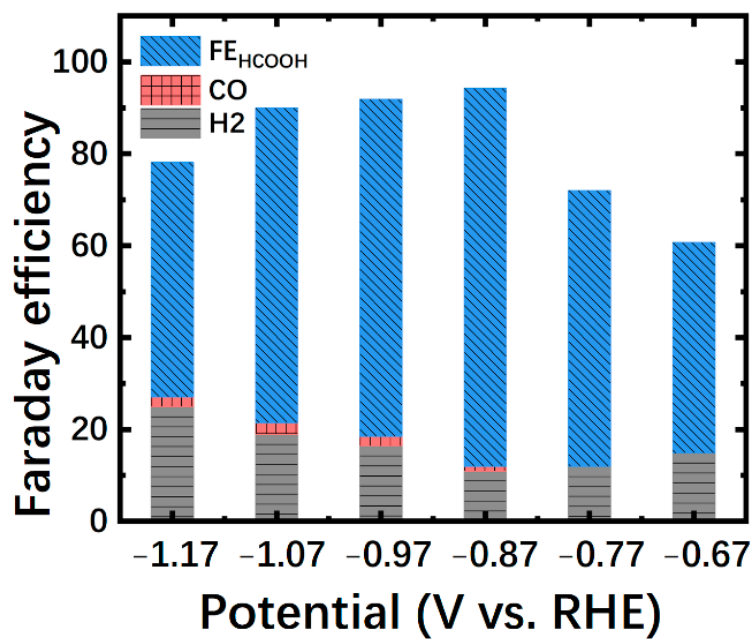

Figure S11. FE of CO<sub>2</sub>RR products at various potentials in CO<sub>2</sub>-saturated 0.5 M KHCO<sub>3</sub> electrolytes on Bi/CP.
